# The American Journal of Psychiatry

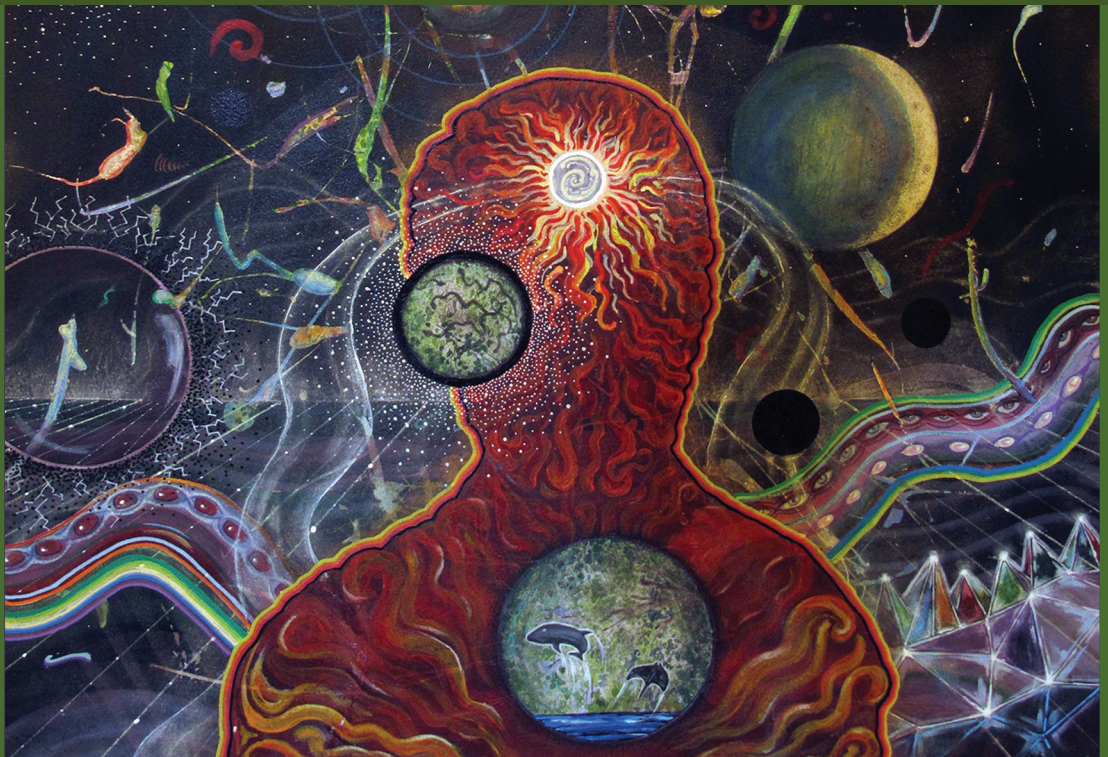

Psychedelics and Psychedelic-Assisted Psychotherapy

Toward Circuit Mechanisms of Pathophysiology in Depression

Identification of Common Neural Circuit Disruptions in  
Emotional Processing Across Psychiatric Disorders

The Rearing Environment and Risk for Major Depression
